# Supplementary material for: Synergistic effect of carbon fibers and carbon nanotubes on improving thermal stability and flame retardancy of polypropylene: a combination of a physical network and chemical crosslinking
Source: Royal Society of Chemistry journal article supplement (doi:10.1039/c4ra11591k), 2014-12-12
Supplement: c4ra11591k1.pdf [file c4ra11591k1.pdf]

## Electronic Supplementary Information (ESI)

### Synergistic effect of carbon fibers and carbon nanotubes on improving thermal stability and flame retardancy of polypropylene: A combination of physical network and chemical crosslinking

5 Jiang Gong, Ran Niu, Xin Wen, Hongfan Yang, Jie Liu, Xuecheng Chen, Zhao-Yan Sun, Ewa Mijowska, and Tao Tang\*

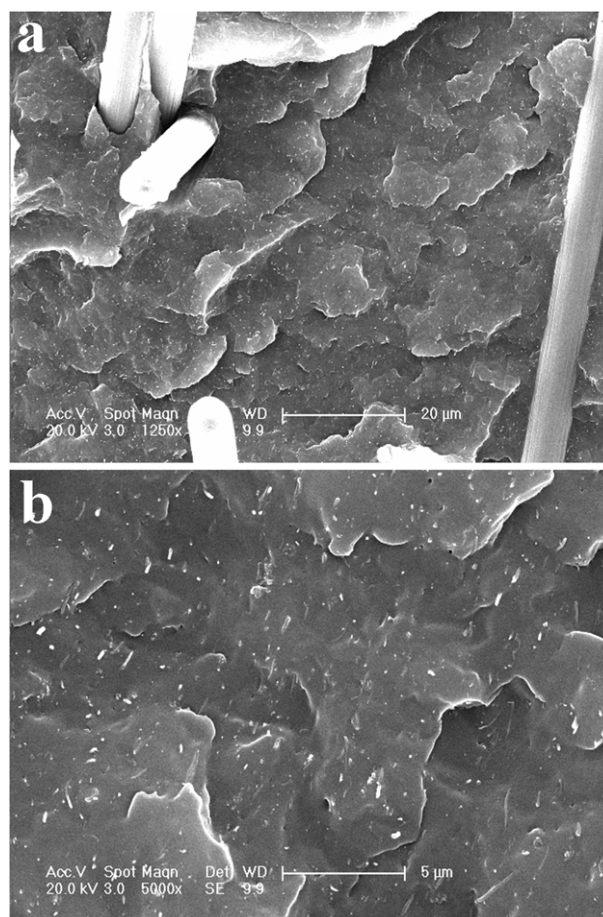

10 **Fig. S1** Typical FE-SEM images (a and b) of 5CNT5CF composite with low magnifications.

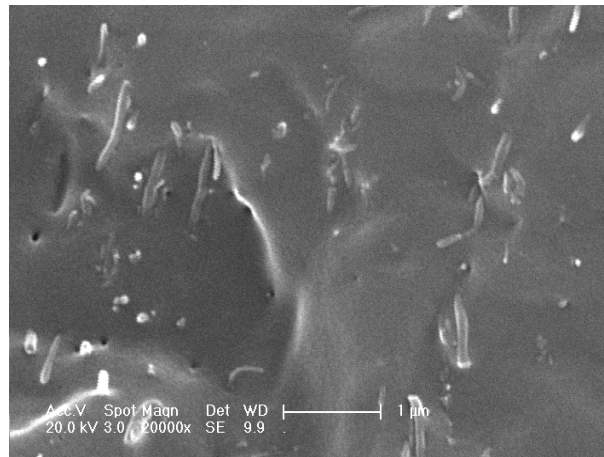

**Fig. S2** Typical FE-SEM image of 5CNT5CF with high magnification.
